# Electroacupuncture Improves Survival in Rats with Lethal Endotoxemia *via* the Autonomic Nervous System

Jian-gang Song, M.D.,\* Hong-hai Li, M.D.,† Yun-fei Cao, M.D.,‡ Xin Lv, M.D.,§ Ping Zhang, M.D.,# Ye-sheng Li, M.D.,|| Yong-jun Zheng, M.D.,\* Qi Li, M.D.,\*\* Pei-hao Yin, M.D.,\*\* Shao-li Song, M.D.,†† Hong-yang Wang, M.D.,‡‡ Xiang-rui Wang, M.D.§§

## ABSTRACT

**Background:** Recent advances have indicated a complex interplay between the autonomic nervous system and the innate immune system. Targeting neural networks for the treatment of sepsis is being developed as a therapeutic strategy. Because electroacupuncture at select acupoints can modulate activities of the autonomic nervous system, we tested the hypothesis that electroacupuncture at specific acupoints could modulate systemic inflammatory responses and improve survival *via* its impact on the autonomic nervous system in a rat model of sepsis.

**Methods:** Sprague-Dawley male rats received electroacupuncture for 45 min before and at 1, 2, or 4 h after a lethal dose of intraperitoneal lipopolysaccharide injection (6 mg/kg). Outcomes included survival and systemic cytokine re-

### What We Already Know about This Topic

- There are complex interactions between the autonomic nervous system and the innate immune system

### What This Article Tells Us That Is New

- Rats pretreated with electroacupuncture at a specific acupoint that affects the efferent neural circuits of the autonomic nervous system attenuated their systemic inflammatory responses and improved their survival from lethal endotoxin administration

sponses. Also, the possible roles of neural circuitry, including the hypothalamic-pituitary-adrenal axis and the autonomic nervous system, were evaluated.

**Results:** Electroacupuncture pretreatment at the Hegu acupoints significantly attenuate systemic inflammatory responses and improve survival rate from 20% to 80% in rats with lethal endotoxemia. Such a site-specific effect requires the activation of muscarinic receptors in the central nervous system, but not increasing central sympathetic tone. In the periphery synergistic, rather than independent, action of the sympathetic and parasympathetic systems is also necessary.

**Conclusions:** Electroacupuncture pretreatment has a dramatic survival-enhancing effect in rats with lethal endotoxemia, which involves the activation of efferent neural circuits of the autonomic nervous system (*e.g.*, cholinergic antiinflammatory pathway). This approach could be developed as a prophylactic treatment for sepsis or perioperative conditions related to excessive inflammation.

**D**ESPITE more than 20 yr of extensive research and development, the incidence of sepsis and the number of sepsis-related deaths are rising. Depending upon the standards of medical care, mortality of sepsis could vary between 30% and 70%.<sup>1,2</sup> Sepsis is a heterogeneous, dynamic syndrome and involves a complex interplay of different biologic systems, most notably the immune system, the coagulation system, and the autonomic nervous system (ANS).<sup>3</sup> Recent advances in the field of neuroimmunology have shown that the ANS is one of the key pathways in the neuroimmune modulating network, and the balance between the two branches of the ANS (*e.g.*, sympathetic and parasympathetic) is important in directing the inflammatory response toward either pro- or antiinflammatory outcomes.<sup>4</sup> Consequently,

\* Attending Physician, §§ Professor, Department of Anesthesiology, Renji Hospital, School of Medicine, Shanghai Jiao Tong University, Shanghai, China. † Associate Professor, # Research Assistant, State Key Laboratory of Oncogenes and Related Genes, Shanghai Cancer Institute, Shanghai Jiao Tong University, Shanghai, China. ‡ Associate Professor, || Resident, Eastern Hepatobiliary Surgery Hospital, the Second Military Medical University, Shanghai, China. §§ Professor, State Key Laboratory of Oncogenes and Related Genes, Shanghai Cancer Institute, Shanghai Jiao Tong University, and Eastern Hepatobiliary Surgery Hospital, the Second Military Medical University. § Attending Physician, Department of Anesthesiology, Shanghai Pneumology Hospital, Tongji University, Shanghai, China. \*\* Associate Professor, Putuo Hospital, Shanghai University of Traditional Chinese Medicine. †† Attending Physician, Department of Nuclear Medicine, Renji Hospital, School of Medicine, Shanghai Jiao Tong University.

Received from the Department of Anesthesiology, Renji Hospital, School of Medicine, Shanghai Jiao Tong University School of Medicine, Shanghai, China. Submitted for publication November 8, 2010. Accepted for publication October 31, 2011. Supported by the National Key Basic Research Program (973 Program) of China (Grant no. 2007CB512504; Beijing, China), National Natural Science Foundation of China (Grant nos. 81001545 and 30700788; Beijing, China), and Shanghai Leading Academic Discipline Project (Grant no. S30203; Shanghai, China). Drs. Jian-gang Song and Hong-hai Li contributed equally to this work.

Address correspondence to Dr. Wang: Department of Anesthesiology, Renji Hospital, School of Medicine, Shanghai Jiao Tong University School of Medicine, Dongfang Road 1630#, Shanghai, China 200127. wangxiangrui2010@gmail.com. Information on purchasing reprints may be found at [www.anesthesiology.org](http://www.anesthesiology.org) or on the masthead page at the beginning of this issue. ANESTHESIOLOGY's articles are made freely accessible to all readers, for personal use only, 6 months from the cover date of the issue.

Copyright © 2012, the American Society of Anesthesiologists, Inc. Lippincott Williams & Wilkins. Anesthesiology 2012; 116:406-14

methods that target the brain-to-immune neural circuits to control excessive immune responses while maintaining optimal host defense, such as transcutaneous vagus nerve stimulation and pharmacologic inhibition of sympathetic nervous system, are being developed for sepsis.<sup>5,6</sup>

Acupuncture is a 5,000-plus-year-old practice that is still widely used in many countries today.<sup>7</sup> Accumulating evidence has demonstrated that acupuncture at select acupoints can modulate activities of the ANS. For example, electroacupuncture at Neiguan (Pc-6; located in the groove caudal to the flexor carpi radialis and cranial to the superficial digital flexor muscles) significantly increases vagal activity, as measured by spectral analysis of heart rate variability.<sup>8,9</sup> In contrast, electroacupuncture at Hegu (Li-4; located at the junction of the first and second metacarpal bones) increases sympathetic tone, as evidenced by elevation of blood pressure and increased renal and adrenal nerve activities.<sup>10,11</sup> Based on these data, we tested the hypothesis that electroacupuncture at specific acupoints could inhibit systemic inflammatory responses and improve survival *via* its impact on the ANS in a rat model of sepsis (systemic administration of endotoxin).

## Materials and Methods

### Animals and Reagents

All studies were conducted in accordance with institutional animal care guidelines and approved by the Animal Care Committee of Shanghai Jiao Tong University (Shanghai, China). Adult male Sprague-Dawley rats (200–300g), provided by Sino-British SIPPR/BK Lab Animal Ltd. Co. (Shanghai, China), were housed at 22°C on a 12-h light/dark cycle.

Lipopolysaccharide (*Escherichia coli* 0111:B4), propranolol, phentolamine, clonidine, and mecamlamine were obtained from Sigma (St. Louis, MO). Atropine methyl nitrate was obtained from International Laboratory USA (San Bruno, CA). All test reagents were dissolved in physiologic saline.

### Electroacupuncture Technique

The acupuncture points used in this study were Hegu (Li-4), located at the junction of the first and the second metacarpal bones, and Neiguan (Pc-6), located in the groove caudal to the flexor carpi radialis and cranial to the superficial digital flexor muscles. A set of nonacupoints located on the ulna side of the metacarpus served as controls. Stainless needles were inserted bilaterally to a depth of 5 mm and then held in place by plastic adhesive tape. Stimulation (current of 4 mA, alternating dense-and-disperse mode, 2 Hz [0.6-ms pulse width] *vs.* 100 Hz stimulation [0.2-ms pulse width], each lasting for 3 s) was delivered using an electrical stimulation device (HANS LH-202, Huawei Co. Beijing, China) for 45 min.

### Chemical Sympathectomy

Rats received a subcutaneous injection of 100 mg/kg guanethidine sulfate (Tokyo Chemical Industry Co. Ltd.,

Tokyo, Japan), dissolved in 0.9% NaCl, pH adjusted to 7.4, or vehicle of same volume for 2 consecutive days.<sup>12</sup>

### Vagotomy

Under anesthesia and sterile condition, the right cervical vagus nerve of rats was exposed, ligated with a 4-0 silk suture, and transected. In sham-operated animals, the cervical vagus nerve was visualized, but was neither isolated from the surrounding tissues nor transected. Rats were allowed to recover for 4 days before the lipopolysaccharide challenge.

### Splenectomy

Under anesthesia and sterile condition, the spleen of rats was identified through a midline laparotomy incision and removed using routine surgical technique. Sham animals received laparotomy without splenectomy. Nine days were allowed for recovery.

### Experiment 1: Effect of Electroacupuncture on Survival

Under sodium pentobarbital anesthesia (50 mg/kg, intraperitoneal injection), rats received electroacupuncture 45 min before and at 1, 2, or 4 h after intraperitoneal lipopolysaccharide injection (6 mg/kg) at the following site: Hegu, Neiguan, or nonacupoints. A group of rats that received pentobarbital anesthesia and lipopolysaccharide, but not electroacupuncture, was included as a blank control. The survival rate was observed within the following 7 days. Each group included 20 rats. This experiment demonstrated superior protective efficacy of electroacupuncture at Hegu, relative to Neiguan and nonacupoints, but only before lipopolysaccharide challenge (fig. 1). Thus, electroacupuncture pretreatment at Hegu acupoints was chosen for subsequent experiments.

### Experiment 2: Effect of Electroacupuncture on the Systemic Inflammatory Response

Rats received electroacupuncture at Hegu or electrostimulation at nonacupoints before lipopolysaccharide challenge. A

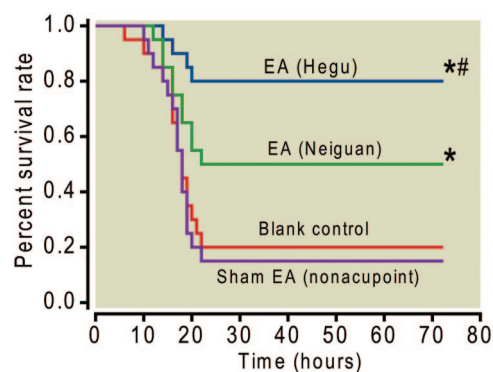

**Fig. 1.** Electroacupuncture pretreatment improves survival in lethal endotoxemia. SD rats received electroacupuncture for 45 min at Hegu (Li-4), Neiguan (Pc-6), or nonacupoints (sham) before a lethal dose of lipopolysaccharide (6 mg/kg, intraperitoneal injection). N = 20; \*  $P < 0.001$  versus blank control or electroacupuncture at nonacupoints; #  $P < 0.05$  versus electroacupuncture at Neiguan. EA = electroacupuncture.

group of rats receiving lipopolysaccharide and anesthesia was included as additional controls. Serum pro-inflammatory cytokines (tumor necrosis factor (TNF)- $\alpha$ , interleukin (IL)-6, and IL-1 $\beta$ ) and a prototype antiinflammatory cytokine (IL-10) were measured at 2, 4, and 6 h after lipopolysaccharide injection with ELISA (R&D Systems; Minneapolis, MN). At each time point, three groups as mentioned above ( $n = 6$  or 10 per group) were included for obtaining blood samples.

### Experiment 3: The Role of Hypothalamic-Pituitary-Adrenal Axis

The hypothalamic-pituitary-adrenal axis is one of the major gateways through which the central nervous system modulates the immune function, and provides an important physiologic feedback loop of inflammation through the antiinflammatory effects of corticosteroids.<sup>4</sup> To examine whether activation of hypothalamic-pituitary-adrenal axis is involved in the protective effect of electroacupuncture, serum corticosteroid was measured immediately after electroacupuncture pretreatment or electrical-stimulation at nonacupoints and at 2 h after lipopolysaccharide challenge. A group of rats receiving lipopolysaccharide and anesthesia and a group of rats receiving only anesthesia were included as additional controls ( $n = 10$  per group). Corticosterone levels were determined using an immunoassay kit (R&D Systems).

### Experiment 4: The Role of Sympathetic Nervous System

In this series of experiments, rats were treated with the following agents at 10 min before electroacupuncture at Hegu: centrally acting  $\alpha_2$ -agonist clonidine (20  $\mu\text{g}/\text{kg}$ , intraperitoneal injection),  $\alpha$ -adrenergic antagonist phenolamine (1 mg/kg, intraperitoneal injection),  $\beta$ -adrenoceptor antagonist propranolol (5 mg/kg, intraperitoneal injection), or saline ( $n = 20$  per group), and then subjected to lipopolysaccharide challenge. A separate group of rats received chemical sympathectomy before electroacupuncture and lipopolysaccharide challenge. Survival was the primary endpoint. In a separate experiment of the same design, serum TNF- $\alpha$  at 2 h after lipopolysaccharide was examined ( $n = 6$  per group).

### Experiment 5: The Role of Parasympathetic Nervous System

In this series of experiments, rats were treated with the following agents before electroacupuncture at Hegu: muscarinic receptor antagonist atropine methyl nitrate (5  $\mu\text{g}/\text{kg}$  in 5  $\mu\text{l}$ ; intracerebroventricular injection under anesthesia; coordinates: 0.8 mm posterior to bregma, 1.5 mm lateral to midline, and 4.0 mm below the skull surface); nicotinic receptor antagonist mecamylamine (1 mg/kg; intraperitoneal injection); atropine methyl nitrate (1 mg/kg; intraperitoneal injection); or saline (intracerebroventricular injection as a control for atropine methyl nitrate; intraperitoneal injection as a control for mecamylamine or atropine methyl nitrate;  $n = 20$  per group), and then subjected to lipopolysaccharide

challenge. Of note, mecamylamine, at the dose 1 mg/kg used in this study, predominantly antagonizes peripheral and nonspecific nicotinic receptors,<sup>13</sup> and atropine methyl nitrate is unable to penetrate the blood-brain barrier.<sup>14</sup> Separate groups of rats receiving vagotomy, splenectomy, or sham surgery before the electroacupuncture pretreatment and lipopolysaccharide challenge were also included in this experiment ( $n = 20$  per group). Survival was the primary endpoint. In a separate experiment of the same design, serum TNF- $\alpha$  was examined at 2 h after lipopolysaccharide challenge ( $n = 6$  per group).

### Statistical Analysis

Data are expressed as mean  $\pm$  SD. In Experiments 2 and 3, comparison of serum inflammatory cytokines and corticosterone levels in the different treatment groups and different time points was carried out by using two-way ANOVA with the Tukey test. In Experiments 4 and 5, the differences of serum TNF- $\alpha$  at 2 h after lipopolysaccharide exposure among different treatment groups were analyzed using one-way ANOVA followed by *post hoc* Bonferroni correction for multiple comparisons. For survival analysis, Kaplan–Meier analysis was used followed by a log-rank test.  $P$  value  $< 0.05$  was considered statistically significant (two-tailed). All statistical analyses were performed by SPSS 16.0 for Windows (SPSS Inc., Chicago, IL).

## Results

### Electroacupuncture Pretreatment at Hegu Improved Survival in Rats with Lethal Endotoxemia

Three out of 20 rats receiving electroacupuncture treatment at nonacupoints before lipopolysaccharide challenge survived the endotoxemia (fig. 1). Electroacupuncture at Hegu before lipopolysaccharide challenge conferred dramatic protection: 16 of 20 rats survived the endotoxemia ( $P < 0.0001$  vs. 4/20 in the blank control). No further dropouts within an observation period of 7 days indicates that electroacupuncture pretreatment conferred a lasting protection and did not merely delay the onset of death. Less protective effects were observed in rats receiving electroacupuncture at Neiguan before lipopolysaccharide challenge (survival rate: 10/20;  $P = 0.049$  vs. Hegu). When delivered after lipopolysaccharide challenge, electroacupuncture treatment did not affect the survival rate at either Hegu or Neiguan.

### Electroacupuncture Pretreatment Attenuated the Systemic Inflammatory Response to Lipopolysaccharide

Figure 2A displays that serum TNF- $\alpha$  was approximately 900 pg/ml at 2 h after the lipopolysaccharide challenge, and decreased to a level less than 60 pg/ml at 4 and 6 h. Such a temporal profile is consistent with previous reports.<sup>15</sup> Electroacupuncture pretreatment at Hegu (but not electro-stimulation at nonacupoints) significantly decreased serum

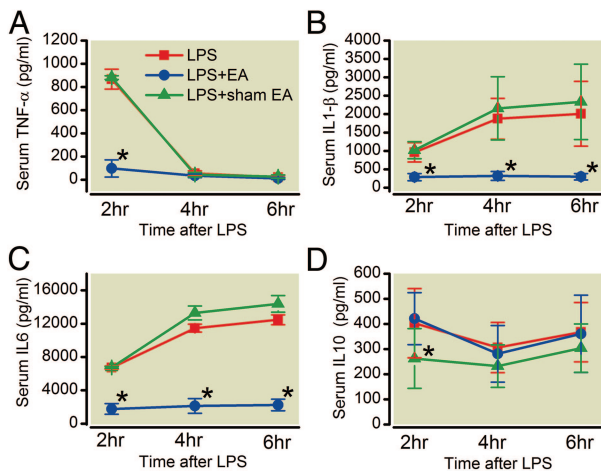

**Fig. 2.** Pretreatment of electroacupuncture at Hegu decreases the serum pro-inflammatory cytokines (e.g., tumor necrosis factor- $\alpha$ , interleukin-6, interleukin-1 $\beta$ ), but does not affect the antiinflammatory cytokine IL-10 in rats receiving lipopolysaccharide. After receiving electroacupuncture at Hegu or nonacupoints (sham), rats were injected with lipopolysaccharide (6 mg/kg, intraperitoneal injection); blood was collected 2, 4, and 6 h afterward. Serum tumor necrosis factor- $\alpha$  (A), interleukin-1 $\beta$  (B), interleukin-6 (C), and interleukin-10 (D) were measured using commercially available ELISA kits. Data are mean  $\pm$  SD. For the time point of 2 h,  $n = 10$  per group; for 4 and 6 h,  $n = 6$  per group. \*  $P < 0.001$  versus LPS alone. EA = electroacupuncture; IL-1 $\beta$  = interleukin-1 $\beta$ ; IL-6 = interleukin-6; IL-10 = interleukin-10; LPS = lipopolysaccharide; TNF- $\alpha$  = tumor necrosis factor- $\alpha$ .

TNF- $\alpha$  level at 2 h after lipopolysaccharide challenge ( $P < 0.0001$ ). TNF- $\alpha$  level at 4 ( $P = 0.23$ ) and 6 h was not affected ( $P = 0.11$ ). Figure 2B displays that serum IL-1 $\beta$  was approximately 1,000 pg/ml at 2 h after the lipopolysaccharide challenge, and reached a plateau at 4 h after lipopolysaccharide challenge. Electroacupuncture pretreatment at Hegu significantly decreased IL-1 $\beta$  throughout the entire observation period ( $P < 0.0001$ ). Figure 2C displays that serum IL-6 was approximately 6,500 pg/ml at 2 h after the lipopolysaccharide challenge, and reached a plateau at 4 h after lipopolysaccharide challenge. Electroacupuncture pretreatment at Hegu significantly decreased IL-6 throughout the entire observation period ( $P < 0.0001$ ). Figure 2D displays that the prototype antiinflammatory cytokine IL-10 was not affected by electroacupuncture pretreatment ( $P = 0.76, 0.45, \text{ and } 0.63$ , respectively).

#### The Protective Effect of Electroacupuncture Pretreatment Could Not Be Attributed to the Activation of Hypothalamic-Pituitary-Adrenal Axis

Serum corticosteroid in rats receiving lipopolysaccharide challenge was significantly decreased, rather than increased, by electroacupuncture pretreatment at Hegu as well as at nonacupoints ( $P < 0.0001$  for both; fig. 3). Electroacupuncture at Hegu or nonacupoints alone also significantly decreased serum corticosteroid levels in rats not exposed to

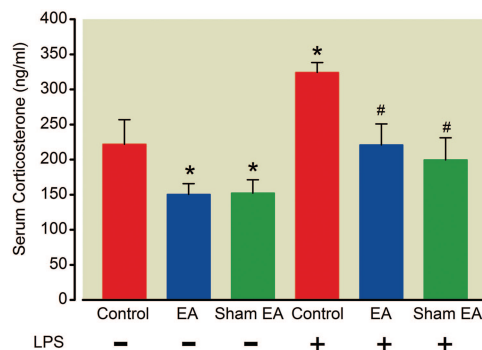

**Fig. 3.** Effects of electroacupuncture (EA) pretreatment *per se* or electroacupuncture pretreatment plus lipopolysaccharide (LPS) on serum corticosterone levels. Electroacupuncture pretreatment does not increase serum corticosterone in rats exposed to LPS. In control rats not exposed to LPS, electroacupuncture at either Hegu or nonacupoints (sham) significantly decreases serum corticosterone levels. Data are mean  $\pm$  SD,  $n = 10$  per group. \*  $P < 0.05$  versus control rats not receiving LPS; #  $P < 0.05$  versus LPS alone.

lipopolysaccharide ( $P < 0.0001$  for both; fig. 3). Thus, the beneficial effect of electroacupuncture is not associated with increasing corticosteroid levels.

#### Peripheral Sympathetic Nervous System and Particularly $\beta$ -adrenoceptors, but Not Increased Central Sympathetic Tone, Are Necessary for the Protective Action of Electroacupuncture

Consistent with a previous study of sympathectomy with 6-hydroxydopamine in an animal model of thermal injury with sepsis,<sup>16</sup> ablation of the sympathetic nervous system with guanethidine before lipopolysaccharide challenge significantly increased survival rate (10/20 *vs.* 3/20 in the control rats;  $P = 0.025$ ) and attenuated serum TNF level ( $P < 0.0001$ ). However, electroacupuncture pretreatment at the Hegu did not confer further protection in sympathectomized rats (survival rate: 8/20 *vs.* 10/20 in sympathectomized rats without electroacupuncture;  $P = 0.66$ ; fig. 4A). Also, serum TNF level did not differ between sympathectomized rats with or without electroacupuncture pretreatment ( $P = 0.49$ ; fig. 4B). Pretreatment with the  $\beta$ -antagonist propranolol (survival rate: 3/20;  $P < 0.0001$ ; TNF- $\alpha$ :  $P < 0.0001$ ), but not the  $\alpha$ -antagonist phentolamine (survival rate: 16/20;  $P = 0.67$ ; TNF- $\alpha$ :  $P = 0.55$ ; figs. 4C and D) completely abolished the effects of electroacupuncture on survival and serum TNF. Somewhat surprisingly, pretreatment with clonidine, a centrally acting  $\alpha_2$ -agonist that decreases central sympathetic tone,<sup>17</sup> did not block the effects of electroacupuncture (survival rate: 18/20;  $P = 0.44$ ; TNF- $\alpha$ :  $P = 0.68$ ; figs. 4E and F).

#### Central Muscarinic Receptor, Vagus Nerve, Peripheral Nicotinic Receptor, and Spleen Are Required for the Protective Action of Electroacupuncture

The vagus nerve has recently been identified as a major pathway through which immune function is regulated by the

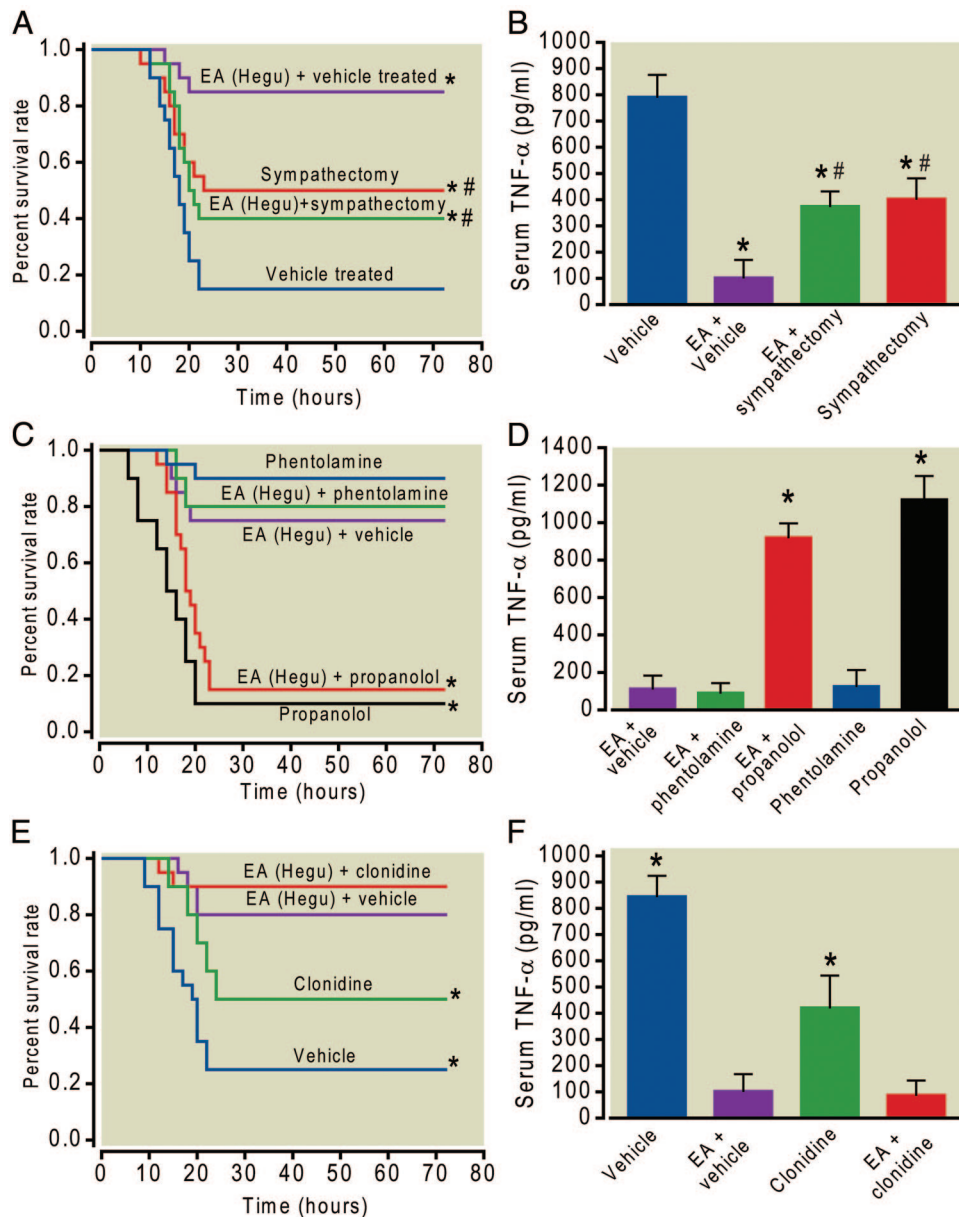

**Fig. 4.** Peripheral sympathectomy or  $\beta$ -adrenoceptor blockade, but not a central sympatholytic, abrogates the protective effect of electroacupuncture. Data are survival rate ( $n = 20$  per group) and serum tumor necrosis factor- $\alpha$  level ( $n = 6$  per group). (A, B) SD rats received guanethidine (100 mg/kg, subcutaneous injection, for 2 consecutive days) or vehicle. On the morning of the third day, rats were pretreated with electroacupuncture, and then received lipopolysaccharide (6 mg/kg, intraperitoneal injection). \*  $P < 0.01$  versus vehicle alone; #  $P < 0.05$  versus electroacupuncture plus vehicle. (C, D) Propranolol (5 mg/kg, intraperitoneal injection), but not phentolamine (1 mg/kg, intraperitoneal injection), abolished the protective effect of electroacupuncture. \*  $P < 0.0001$  versus electroacupuncture plus vehicle control. (E, F) Intraperitoneal injection of clonidine, a centrally acting  $\alpha_2$ -adrenoceptor agonist (20  $\mu$ g/kg, dissolved in saline), does not affect the protective effect of electroacupuncture. \*  $P < 0.01$  versus electroacupuncture plus vehicle control. EA = electroacupuncture; TNF- $\alpha$  = tumor necrosis factor- $\alpha$ .

central nervous system, which is termed the “cholinergic antiinflammatory pathway.”<sup>18</sup> Our results indicated that unilateral (right-sided) cervical vagotomy before lipopolysaccharide challenge significantly attenuated the protective effects of electroacupuncture pretreatment (survival rate: 7/20 vs. 16/20 in sham-operated rats;  $P = 0.005$ ; TNF- $\alpha$ :  $P < 0.0001$ ; figs. 5A and B). Systemic treatment with the nicotinic antagonist mecamylamine (survival rate: 4/20;  $P <$

0.001; TNF- $\alpha$ :  $P < 0.001$ ), but not the muscarinic antagonist atropine methyl nitrate (survival rate: 19/20;  $P = 0.32$ ; TNF- $\alpha$ :  $P = 0.65$ ; figs. 5C and D), completely blocked the protective effects of electroacupuncture. Atropine methyl nitrate delivered directly into the brain completely blocked the protective effects of electroacupuncture (survival rate of 6/20 vs. 15/20 in vehicle controls;  $P = 0.007$ ; TNF- $\alpha$ :  $P < 0.0001$ ; figs. 5E and F). These results are consistent with an

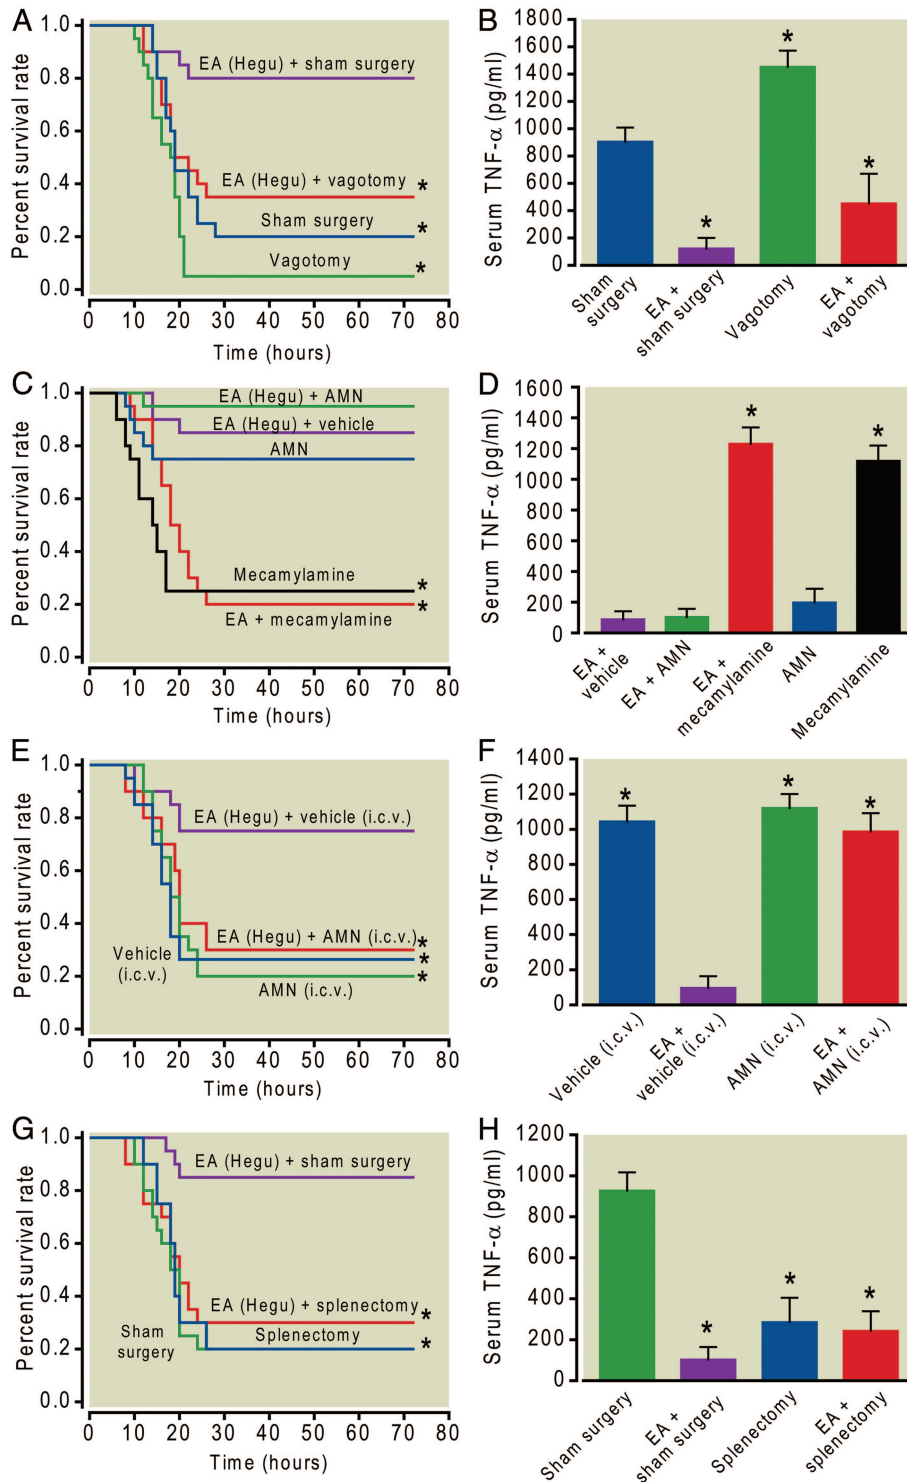

**Fig. 5.** Central muscarinic receptor, vagus nerve, peripheral nicotinic receptor, and spleen are required for the protective action of electroacupuncture at Hegu. Data are survival rate (n = 20 per group) and serum tumor necrosis factor- $\alpha$  level (n = 6 per group). (A, B) Cervical vagotomy versus sham surgery, at 4 days before lipopolysaccharide injection (6 mg/kg, intraperitoneal injection). \*  $P < 0.01$  versus electroacupuncture plus sham surgery. (C, D) Pretreatment with the nicotinic receptor antagonist mecamylamine (1 mg/kg, intraperitoneal injection) versus the muscarinic receptor antagonist atropine methyl nitrate (1 mg/kg, intraperitoneal injection). \*  $P < 0.001$  versus electroacupuncture plus vehicle control. (E, F) Atropine methyl nitrate (5  $\mu$ g/kg), delivered via the intracerebroventricular route at 15 min before electroacupuncture pretreatment. \*  $P < 0.001$  versus electroacupuncture plus vehicle control. (G, H) Surgical ablation of the spleen \*  $P < 0.001$  versus sham surgery. AMN = atropine methyl nitrate; EA = electroacupuncture; i.c.v. = intracerebroventricular; TNF- $\alpha$  = tumor necrosis factor- $\alpha$  level.

important role of the central muscarinic receptors in modulating peripheral cytokine production.<sup>19</sup> Recent work on the anatomical basis of the cholinergic antiinflammatory pathway indicates that the spleen is required for vagus control of inflammation, although the splenic nerve is classified as catecholaminergic.<sup>20</sup> In our study, although splenectomy *per se* significantly reduced serum TNF- $\alpha$  level compared with sham surgery group ( $P < 0.0001$ ; fig. 5H), which is consistent with a previous study,<sup>21</sup> it did not improve the survival rate of rats challenged with a lethal dose of lipopolysaccharide ( $P = 0.77$ ; fig. 5G). When electroacupuncture was applied to splenectomized animals, its survival-enhancing effect disappeared (survival rate of 6/20 *vs.* 17/20 in sham surgery controls;  $P < 0.0001$ ; fig. 5G). Also, electroacupuncture failed to inhibit serum TNF- $\alpha$  level in splenectomized animals, unlike in intact animals ( $P = 0.50$ ; fig. 5H).

## Discussion

The current study for the first time demonstrated that electroacupuncture pretreatment at the Hegu acupoints can dramatically improve survival in rats with lethal endotoxemia. The production of proinflammatory cytokines (TNF- $\alpha$ , IL-6 and IL-1 $\beta$ ) was also significantly attenuated, but anti-inflammatory cytokine serum IL-10 was not affected.

Our study also demonstrated selectivity of the acupuncture: electroacupuncture at Hegu acupoints produced more powerful protection than electroacupuncture at Neiguan acupoints; electrostimulation at nonacupoints was not effective at all. To our knowledge, the site-specific effects of acupuncture, *i.e.*, “true” treatment acupoints with selective physiologic effects, have not been fully validated or accepted. A few influential clinical trials of migraine headache failed to show significant difference between acupuncture at select acupoints *versus* sham acupuncture.<sup>22,23</sup> In the current study, the use of anesthesia during electroacupuncture excluded some likely nonspecific physiologic effects caused by electrostimulation procedure, such as pain and immobilization stress, and thus provided more solid evidence for the existence of site-specific effects.

The timing of electroacupuncture treatment seems critical for the “rescue” effect in our study, because electroacupuncture must be delivered before lipopolysaccharide injection to produce a protective action. We speculate that the explicit requirement for pretreatment may be specific to the lipopolysaccharide model used in this study: immune pathology of endotoxemia models using bolus injection is characterized by a very rapid and overwhelming innate immune response that is very difficult to stop once it is in motion. Although bacterial infection models do not recapitulate many important features of human sepsis, they can provide important insights into mechanisms of the host response to pathogens.<sup>24</sup>

During the past decade, the immunomodulatory efficacy of acupuncture has been supported by increasing number of

randomized controlled clinical trials for a number of immune- or inflammatory-related diseases, such as allergic asthma,<sup>25</sup> childhood persistent allergic rhinitis,<sup>26</sup> and rheumatoid arthritis.<sup>27,28</sup> Animal studies have also indicated that acupuncture pretreatment has protective effects against endotoxin-induced acute lung and kidney injuries.<sup>29,30</sup> However, little is known about its biologic basis.

In this study, we found that electroacupuncture at Hegu does not enhance the release of glucocorticoids or antiinflammatory cytokines (*e.g.*, IL-10), suggesting that humoral pathways are not responsible for the immunomodulatory efficacy of electroacupuncture. Instead, such an effect requires the participation of muscarinic receptors in the central nervous system, but not increasing central sympathetic tone. Synergistic, rather than independent, action of peripheral sympathetic and parasympathetic systems is also necessary. At the first glance, these results seem difficult to explain or discriminate the roles of sympathetic and parasympathetic components. However, newly identified cholinergic antiinflammatory pathway suggests that the long-standing attempt to separate the neural circuitry that controls immune responses into discrete sympathetic and parasympathetic components is imprecise. On the contrary, at least in the periphery, the involvements of sympathetic *versus* parasympathetic systems are not independent, either anatomically or functionally.<sup>18</sup> From a systematic perspective, our data strongly support this important conceptual advance. We now put forward the following framework mainly based on the cholinergic antiinflammatory pathway to explain our findings: electroacupuncture at Hegu activates a brain muscarinic receptor-mediated network possibly through somatoautonomic reflexes,<sup>31,32</sup> and subsequently increases vagus nerve activity. The vagus nerve terminates in synaptic-like structures around principal cells of the celiac-superior mesenteric plexus ganglia, a site where catecholaminergic splenic fibers originate. *Via* two serially connected neurons in these ganglia, vagus nerve modulates the activities of splenic nerve through nicotinic acetylcholine receptor.<sup>33</sup> Increased norepinephrine released by the splenic nerve then acts on  $\beta$ -adrenergic receptors expressed on B and T cells of the spleen to produce acetylcholine.<sup>34,35</sup> Enhanced acetylcholine levels in the spleen then activates nicotinic receptor expressed on macrophages to inhibit proinflammatory cytokine release.

In addition, since it has been suggested that lipopolysaccharide-induced hemodynamic instability contributes to mortality,<sup>36</sup> a paradoxical hypertensive response mediated by stimulation at Hegu acupoints might explain electroacupuncture’s survival-enhancing effect. However, both previous studies<sup>10,11</sup> and our preliminary data indicated that the pressor response elicited by electroacupuncture at Hegu acupoints lasts for only 2 or 3 min after cessation of the stimulation. Also, if the protective effect is mediated by pressor effect, electroacupuncture delivered after lipopolysaccharide injection should have been more effective; however, it’s

clearly not the case in this study. Thus, hemodynamic effect produced by electroacupuncture cannot account for its survival-enhancing effect.

In conclusion, electroacupuncture pretreatment at the Hegu acupoints inhibited systemic inflammatory responses and enhanced survival in rats with lethal endotoxemia. The underlying mechanism involves the activation of efferent neural circuits of the ANS, *e.g.*, the cholinergic antiinflammatory pathway. These findings encourage the development of electroacupuncture as a prophylactic treatment for sepsis or other perioperative conditions related to excessive inflammation.

## References

1. Angus DC, Linde-Zwirble WT, Lidicker J, Clermont G, Carcillo J, Pinsky MR: Epidemiology of severe sepsis in the United States: Analysis of incidence, outcome, and associated costs of care. *Crit Care Med* 2001; 29:1303-10
2. Martin GS, Mannino DM, Eaton S, Moss M: The epidemiology of sepsis in the United States from 1979 through 2000. *N Engl J Med* 2003; 348:1546-54
3. Rittirsch D, Flierl MA, Ward PA: Harmful molecular mechanisms in sepsis. *Nat Rev Immunol* 2008; 8:776-87
4. Sternberg EM: Neural regulation of innate immunity: a coordinated nonspecific host response to pathogens. *Nat Rev Immunol* 2006; 6:318-28
5. Huston JM, Gallowitsch-Puerta M, Ochani M, Ochani K, Yuan R, Rosas-Ballina M, Ashok M, Goldstein RS, Chavan S, Pavlov VA, Metz CN, Yang H, Czura CJ, Wang H, Tracey KJ: Transcutaneous vagus nerve stimulation reduces serum high mobility group box 1 levels and improves survival in murine sepsis. *Crit Care Med* 2007; 35:2762-8
6. Wu R, Zhou M, Das P, Dong W, Ji Y, Yang D, Miksa M, Zhang F, Ravikumar TS, Wang P: Ghrelin inhibits sympathetic nervous activity in sepsis. *Am J Physiol Endocrinol Metab* 2007; 293:E1697-702
7. Zijlstra FJ, van den Berg-de Lange I, Huygen FJ, Klein J: Anti-inflammatory actions of acupuncture. *Mediators Inflamm* 2003; 12:59-69
8. Huang ST, Chen GY, Lo HM, Lin JG, Lee YS, Kuo CD: Increase in the vagal modulation by acupuncture at neiguan point in the healthy subjects. *Am J Chin Med* 2005; 33:157-64
9. Ouyang H, Yin J, Wang Z, Pasricha PJ, Chen JD: Electroacupuncture accelerates gastric emptying in association with changes in vagal activity. *Am J Gastrointest Liver Physiol* 2002; 282:390-6
10. Lin TB, Fu TC, Chen CF, Lin YJ, Chien CT: Low and high frequency electroacupuncture at Hoku elicits a distinct mechanism to activate sympathetic nervous system in anesthetized rats. *Neurosci Lett* 1998; 247:155-8
11. Lin TB, Fu TC: Effect of electroacupuncture on blood pressure and adrenal nerve activity in anesthetized rats. *Neurosci Lett* 2000; 285:37-40
12. Navegantes LC, Resano NM, Baviera AM, Migliorini RH, Kettelhut IC: Effect of sympathetic denervation on the rate of protein synthesis in rat skeletal muscle. *Am J Physiol Endocrinol Metab* 2004; 286:E642-7
13. Young JM, Shytle RD, Sanberg PR, George TP. Mecamylamine: New therapeutic uses and toxicity/risk profile. *Clin Ther* 2001;23:532-65
14. Pavlov VA, Parrish WR, Rosas-Ballina M, Ochani M, Puerta M, Ochani K, Chavan S, Al-Abed Y, Tracey KJ: Brain acetylcholinesterase activity controls systemic cytokine levels through the cholinergic anti-inflammatory pathway. *Brain Behav Immun* 2009; 23:41-5
15. Remick DG, Ward PA: Evaluation of endotoxin models for the study of sepsis. *Shock* 2005; 24 Suppl 1:7-11
16. Tang Y, Shankar R, Gamboa M, Desai S, Gamelli RL, Jones SB: Norepinephrine modulates myelopoiesis after experimental thermal injury with sepsis. *Ann Surg* 2001; 233:266-75
17. Scheinin M, Schwinn DA: The locus coeruleus. Site of hypnotic actions of  $\alpha_2$ -adrenoceptor agonists? *ANESTHESIOLOGY* 1992; 76:873-5
18. Tracey KJ: Reflex control of immunity. *Nat Rev Immunol* 2009; 9:418-28
19. Pavlov VA, Ochani M, Gallowitsch-Puerta M, Ochani K, Huston JM, Czura CJ, Al-Abed Y, Tracey KJ: Central muscarinic cholinergic regulation of the systemic inflammatory response during endotoxemia. *Proc Natl Acad Sci U S A* 2006; 103:5219-23
20. Rosas-Ballina M, Ochani M, Parrish WR, Ochani K, Harris YT, Huston JM, Chavan S, Tracey KJ: Splenic nerve is required for cholinergic antiinflammatory pathway control of TNF in endotoxemia. *Proc Natl Acad Sci U S A* 2008; 105:11008-13
21. Huston JM, Ochani M, Rosas-Ballina M, Liao H, Ochani K, Pavlov VA, Gallowitsch-Puerta M, Ashok M, Czura CJ, Foxwell B, Tracey KJ, Ulloa L: Splenectomy inactivates the cholinergic antiinflammatory pathway during lethal endotoxemia and polymicrobial sepsis. *J Exp Med* 2006; 203:1623-8
22. Linde K, Streng A, Jürgens S, Hoppe A, Brinkhaus B, Witt C, Wagenpfeil S, Pfaffenrath V, Hammes MG, Weidenhammer W, Willich SN, Melchart D: Acupuncture for patients with migraine: A randomized controlled trial. *JAMA* 2005; 293:2118-25
23. Melchart D, Streng A, Hoppe A, Brinkhaus B, Witt C, Wagenpfeil S, Pfaffenrath V, Hammes M, Hummelsberger J, Irnich D, Weidenhammer W, Willich SN, Linde K: Acupuncture in patients with tension-type headache: Randomised controlled trial. *BMJ* 2005; 331:376-82
24. Buras JA, Holzmann B, Sitkovsky M: Animal models of sepsis: Setting the stage. *Nat Rev Drug Discov* 2005; 4:854-65
25. Joos S, Schott C, Zou H, Daniel V, Martin E: Immunomodulatory effects of acupuncture in the treatment of allergic asthma: a randomized controlled study. *J Altern Complement Med* 2000; 6:519-25
26. Ng DK, Chow PY, Ming SP, Hong SH, Lau S, Tse D, Kwong WK, Wong MF, Wong WH, Fu YM, Kwok KL, Li H, Ho JC: A double-blind, randomized, placebo-controlled trial of acupuncture for the treatment of childhood persistent allergic rhinitis. *Pediatrics* 2004; 114:1242-7
27. Usichenko TI, Ivashkivsky OI, Gizhko VV: Treatment of rheumatoid arthritis with electromagnetic millimeter waves applied to acupuncture points—a randomized double blind clinical study. *Acupunct Electrother Res* 2003; 28:11-8
28. Bernateck M, Becker M, Schwake C, Hoy L, Passie T, Parlesak A, Fischer MJ, Fink M, Karst M: Adjuvant auricular electroacupuncture and autogenic training in rheumatoid arthritis: A randomized controlled trial. Auricular acupuncture and autogenic training in rheumatoid arthritis. *Forsch Komplettmed* 2008; 15:187-93
29. Huang CL, Huang CJ, Tsai PS, Yan LP, Xu HZ: Acupuncture stimulation of ST-36 (Zusanli) significantly mitigates acute lung injury in lipopolysaccharide-stimulated rats. *Acta Anaesthesiol Scand* 2006; 50:722-30
30. Huang CL, Tsai PS, Wang TY, Yan LP, Xu HZ, Huang CJ: Acupuncture stimulation of ST36 (Zusanli) attenuates acute renal but not hepatic injury in lipopolysaccharide-stimulated rats. *Anesth Analg* 2007; 104:646-54
31. Haker E, Egekvist H, Bjerring P: Effect of sensory stimulation (acupuncture) on sympathetic and parasympathetic activities in healthy subjects. *J Auton Nerv Syst* 2000; 79:52-9



32. Budgell B, Sato A: Modulations of autonomic functions by somatic nociceptive inputs. *Prog Brain Res* 1996; 113:525-39
33. Vida G, Peña G, Deitch EA, Ulloa L:  $\alpha$ 7-cholinergic receptor mediates vagal induction of splenic norepinephrine. *J Immunol* 2011; 186:4340-6
34. Leaders FE, Dayrit C: The cholinergic component in the sympathetic innervation to the spleen. *J Pharmacol Exp Ther* 1965; 147:145-52
35. Brandon, KW, Rand MJ: Acetylcholine and the sympathetic innervation of the spleen. *J Physiol* 1961; 157:18-32
36. Fink MP, Heard SO: Laboratory models of sepsis and septic shock. *J Surg Res* 1990; 49:186-96

## ANESTHESIOLOGY REFLECTIONS

### The Ethereal Peter Parker, M.D., D.D.

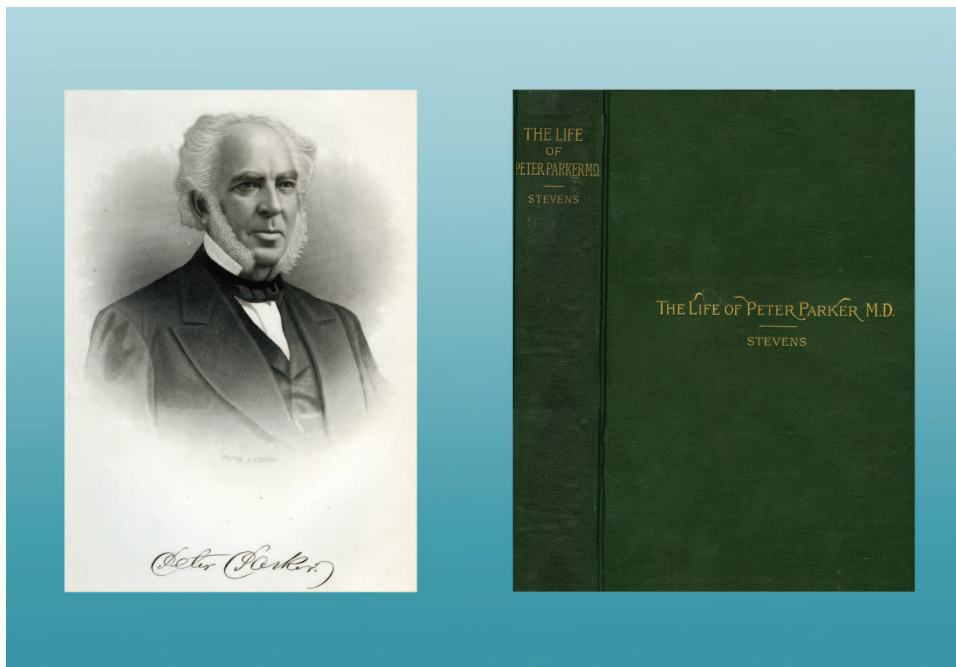

“Peter Parker” is regarded as the alter ego of the fictional character Spiderman by many younger physicians; however, older professionals may recognize “Peter Parker” as the name of the Presbyterian medical missionary who introduced surgical anesthesia to China. Indeed, Rev. Dr. Parker (1814–1888) was etherizing Chinese patients for surgery as early as the summer of 1847 and was chloroforming others by the following year. In later years, Parker’s likeness (*left*) was captured by engraver A. H. Ritchie. In 1896 a Yale professor named Rev. George B. Stevens, M.D., published (*right*) a 356-page biography, *The Life, Letters, and Journals of the Rev. and Hon. Peter Parker, M.D., Missionary, Physician, and Diplomatist: The Founder of Medical Missions and Founder of the Ophthalmic Hospital in Canton*. Biographer Stevens’ reference to Parker as “diplomatist” reminds readers that the missionary also served on diplomatic missions as an interpreter on behalf of U.S. Presidents Tyler and then Pierce in negotiating America’s first treaty with China. (Copyright © the American Society of Anesthesiologists, Inc. This image also appears in the Anesthesiology Reflections online collection available at [www.anesthesiology.org](http://www.anesthesiology.org).)

George S. Bause, M.D., M.P.H., Honorary Curator, ASA’s Wood Library-Museum of Anesthesiology, Park Ridge, Illinois, and Clinical Associate Professor, Case Western Reserve University, Cleveland, Ohio. [UJYC@aol.com](mailto:UJYC@aol.com).
